# Supplementary material for: [Ga10S16(NC7H9)4]2–: a hybrid supertetrahedral nanocluster
Source: Royal Society of Chemistry journal article supplement (doi:10.1039/b704724j), 2007-01-01
Supplement: b704724j.pdf [file b704724j.pdf]

## $[\text{Ga}_{10}\text{S}_{16}(\text{NC}_7\text{H}_9)_4]^{2-}$ : a hybrid supertetrahedral nanocluster

Paz Vaqueiro\*<sup>a</sup> and M. Lucia Romero<sup>a</sup>

Thermogravimetric analysis was performed using a DuPont Instruments 951 thermal analyser. Approximately 10 mg of finely ground crystals were heated under a flow of dry nitrogen over the temperature range 25-700°C at a heating rate of 5°C min<sup>-1</sup>. Powder X-ray diffraction data on a ground portion of the bulk samples were collected with nickel-filtered Cu-K $\alpha$  radiation ( $\lambda=1.5418$  Å), using a Philips PA2000 powder diffractometer.

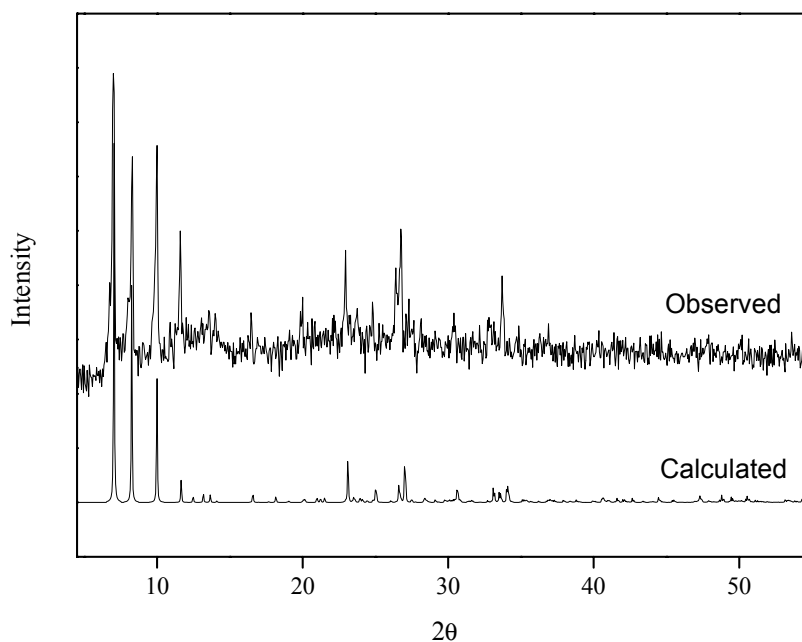

**Figure 1S.** Observed powder X-ray diffraction patterns for the bulk product of the reaction producing  $[\text{C}_7\text{H}_{10}\text{N}]_2[\text{Ga}_{10}\text{S}_{16}(\text{NC}_7\text{H}_9)_4]$ . The calculated powder diffraction pattern has been included for comparison purposes.

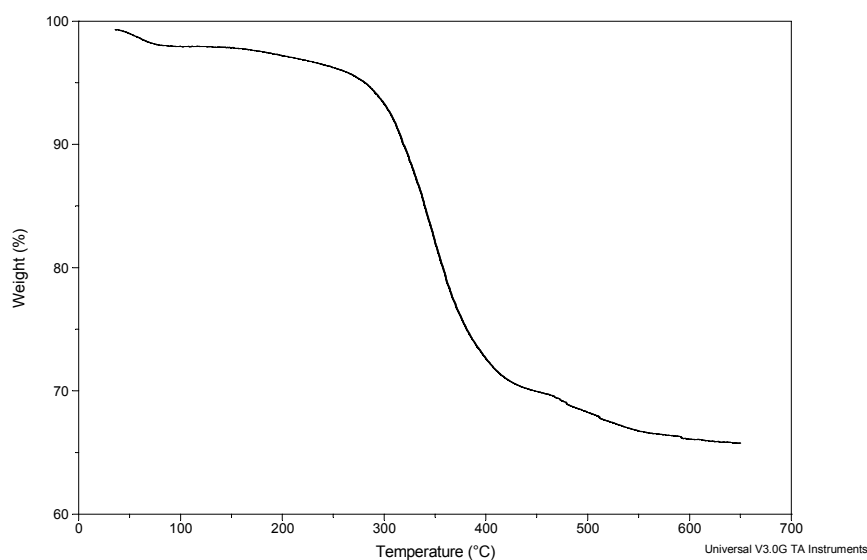

**Figure S2.** TGA data for  $[\text{C}_7\text{H}_{10}\text{N}]_2[\text{Ga}_{10}\text{S}_{16}(\text{NC}_7\text{H}_9)_4]$ .
